# Supplementary material for: Modulating the luminescent performances on blue-emitting coordination polymersviatuning the end-solvent molecules
Source: Royal Society of Chemistry journal article supplement (doi:10.1039/d3ce00551h), 2023-01-01
Supplement: d3ce00551h1.pdf [file d3ce00551h1.pdf]

## Supporting Information

# Modulating the luminescent performances on blue-emitting coordination polymers via tuning the end-solvent molecules

Hui Hu,<sup>a#</sup> Zhen-Wei Zhang,<sup>a,b#</sup> Da-Shuai Zhang\*,<sup>a,b</sup> Xue Zhou,<sup>a</sup> Hui Ji,<sup>b</sup>  
Yong-Zheng Zhang,<sup>a</sup> Yuchen Deng,<sup>a</sup> Longlong Geng\*,<sup>a,b</sup> Xiuling Zhang,<sup>a,b</sup>  
Chao Lv,<sup>a</sup> Rongmin Wei,<sup>a</sup> Jin-Hua Wang\*,<sup>c</sup>

<sup>a</sup> *Shandong Provincial Key Laboratory of Monocrystalline Silicon Semiconductor Materials and Technology, Shandong Universities Engineering Research Center of Integrated Circuits Functional Materials and Expanded Applications, College of Chemistry and Chemical Engineering, Dezhou University, Dezhou 253023, PR China*

<sup>b</sup> *School of Chemistry and Chemical Engineering, Shandong University of Technology, Zibo 255000, PR China*

<sup>c</sup> *College of Medicine and Nursing, Dezhou University, Dezhou, 253023, P. R. China*

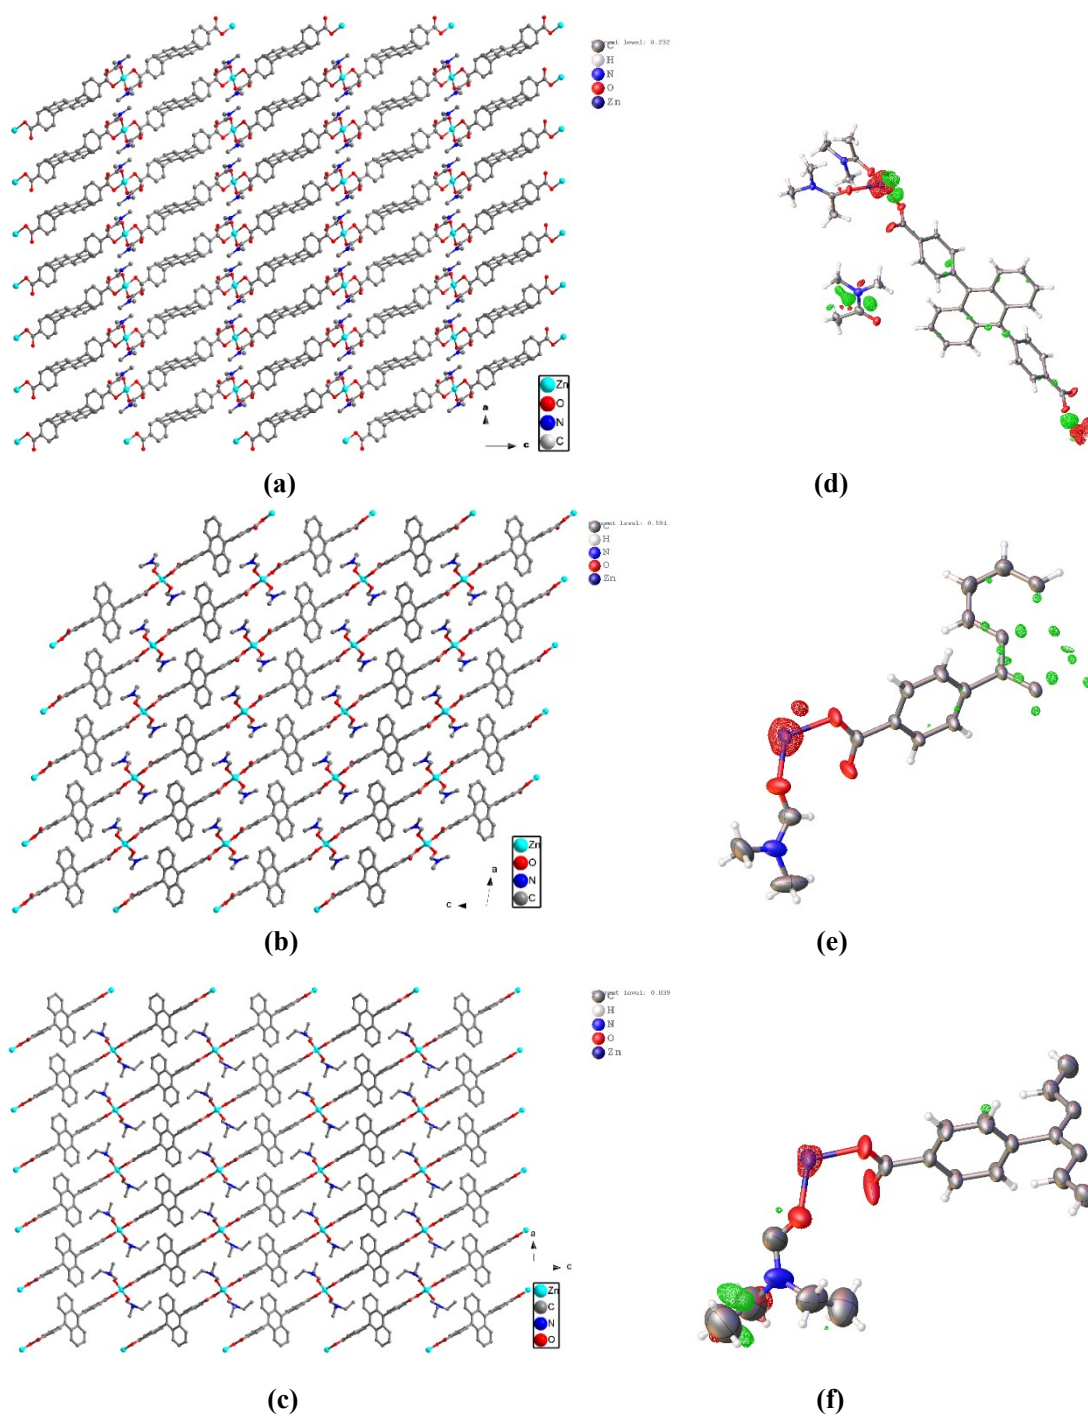

**Fig. S1.** Packing structures of **Hui-3-DMA** (a), **Hui-3-DMF** (b) and **Hui-3-DEF** (c) along *b* axis; Structural drawings showing ADPs of each structure: **Hui-3-DMA** (d), **Hui-3-DMF** (e) and **Hui-3-DEF** (f).

**Table S1.** Crystal data and structure refinement parameters for the Complexes.

| Complex                                                  | Hui-3-DMA                                                        | Hui-3-DMF                                                        | Hui-3-DEF                                                        |
|----------------------------------------------------------|------------------------------------------------------------------|------------------------------------------------------------------|------------------------------------------------------------------|
| Empirical formula                                        | C <sub>40</sub> H <sub>43</sub> N <sub>3</sub> O <sub>7</sub> Zn | C <sub>34</sub> H <sub>30</sub> N <sub>2</sub> O <sub>6</sub> Zn | C <sub>38</sub> H <sub>36</sub> N <sub>2</sub> O <sub>6</sub> Zn |
| Formula weight                                           | 743.14                                                           | 625.95                                                           | 682.06                                                           |
| Crystal system                                           | Monoclinic                                                       | Monoclinic                                                       | Monoclinic                                                       |
| Space group                                              | <i>Cc</i>                                                        | <i>C2/c</i>                                                      | <i>C2/c</i>                                                      |
| <i>a</i> (Å)                                             | 13.27180(10)                                                     | 17.1162(10)                                                      | 16.874(3)                                                        |
| <i>b</i> (Å)                                             | 9.25150(10)                                                      | 6.8868(4)                                                        | 6.9253(11)                                                       |
| <i>c</i> (Å)                                             | 27.9580(2)                                                       | 25.8217(15)                                                      | 28.607(5)                                                        |
| $\alpha$ (°)                                             | 90                                                               | 90                                                               | 90                                                               |
| $\beta$ (°)                                              | 90.3710(10)                                                      | 98.038(2)                                                        | 91.960(10)                                                       |
| $\gamma$ (°)                                             | 90                                                               | 90                                                               | 90                                                               |
| <i>V</i> (Å <sup>3</sup> )                               | 3432.72(5)                                                       | 3013.9(3)                                                        | 3341.0(10)                                                       |
| <i>Z</i>                                                 | 4                                                                | 4                                                                | 4                                                                |
| D <sub>c</sub> (g cm <sup>-3</sup> )                     | 1.438                                                            | 1.380                                                            | 1.356                                                            |
| <i>F</i> (000)                                           | 1560.0                                                           | 1296.0                                                           | 1424.0                                                           |
| 2 $\theta$ range for data collection (°)                 | 11.66 to 146.858                                                 | 6.374 to 56.65                                                   | 5.692 to 54.862                                                  |
| Goodness-of-fit on F <sup>2</sup>                        | 1.063                                                            | 1.087                                                            | 1.109                                                            |
| Final R indexes [ <i>I</i> ≥ 2σ ( <i>I</i> )]            | R <sub>1</sub> = 0.0294, wR <sub>2</sub> = 0.0793                | R <sub>1</sub> = 0.0356, wR <sub>2</sub> = 0.0866                | R <sub>1</sub> = 0.0609, wR <sub>2</sub> = 0.1728                |
| Final R indexes [all data]                               | R <sub>1</sub> = 0.00295, wR <sub>2</sub> = 0.0793               | R <sub>1</sub> = 0.0450, wR <sub>2</sub> = 0.0907                | R <sub>1</sub> = 0.0716, wR <sub>2</sub> = 0.1815                |
| Largest difference in peak and hole (e Å <sup>-3</sup> ) | 0.61/-0.28                                                       | 0.31/-0.35                                                       | 0.95/-0.47                                                       |

**Table S2.** Selected Bond Lengths [Å] and Bond Angles [deg] for the Complexes

| <b>Hui-3-DMA</b>      |            |                         |            |
|-----------------------|------------|-------------------------|------------|
| Zn(1) - O(1)          | 1.944(3)   | Zn(1)#1 - O(4)          | 1.939(3)   |
| Zn(1) - O(5)          | 2.000(3)   | Zn(1) - O(6)            | 2.026(3)   |
| Zn(1) - O(4)#2        | 1.939(3)   | O(1) - Zn(1) - O(5)     | 96.22(13)  |
| O(1) - Zn(1) - O(6)   | 126.69(13) | O(4)#2 - Zn(1) - O(1)   | 119.77(9)  |
| O(4)#2 - Zn(1) - O(5) | 126.25(13) | O(4)#2 - Zn(1) - O(6)   | 94.69(12)  |
| O(5) - Zn(1) - O(6)   | 93.19(7)   |                         |            |
| <b>Hui-3-DMF</b>      |            |                         |            |
| Zn(1) - O(1)          | 1.9261(12) | Zn(1) - O(1)#1          | 1.9262(12) |
| Zn(1) - O(3)          | 1.9735(15) | Zn(1) - O(3)#1          | 1.9735(15) |
| O(1)#1 - Zn(1) - O(1) | 101.77(8)  | O(3)#1 - Zn(1) - O(1)   | 107.47(6)  |
| O(3) - Zn(1) - O(1)   | 118.49(7)  | O(3)#1 - Zn(1) - O(1)#1 | 118.49(7)  |
| O(3) - Zn(1) - O(1)#1 | 107.47(6)  | O(3)#1 - Zn(1) - O(3)   | 103.97(11) |
| <b>Hui-3-DEF</b>      |            |                         |            |
| Zn(1) - O(1)          | 1.933(2)   | Zn(1) - O(1)#1          | 1.933(2)   |
| Zn(1) - O(3)          | 1.984(3)   | Zn(1) - O(3)#1          | 1.984(3)   |
| O(1)#1 - Zn(1) - O(1) | 98.59(14)  | O(3)#1 - Zn(1) - O(1)   | 114.50(13) |
| O(3) - Zn(1) - O(1)   | 109.96(12) | O(3)#1 - Zn(1) - O(1)#1 | 109.96(12) |
| O(3) - Zn(1) - O(1)#1 | 114.50(13) | O(3)#1 - Zn(1) - O(3)   | 109.2(2)   |

<sup>Hui-3-DMA</sup>Symmetry codes#1: 1/2+X,3/2-Y,1/2+Z; #2: -1/2+X,3/2-Y,-1/2+Z; <sup>Hui-3-DMF</sup>Symmetry codes#1: -X,+Y,1/2-Z; #2: 1/2-X,3/2-Y,-Z; <sup>Hui-3-DEF</sup>Symmetry codes#1: 1-X,+Y,1/2-Z; #2: 1/2-X,5/2-Y,-Z;

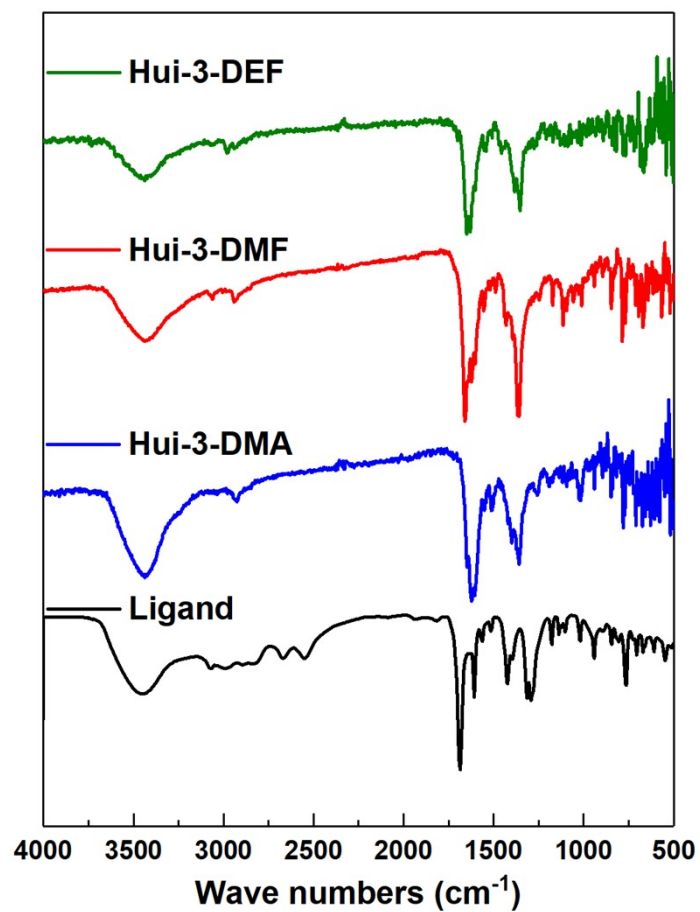

Fig. S2. IR spectra of the compounds.

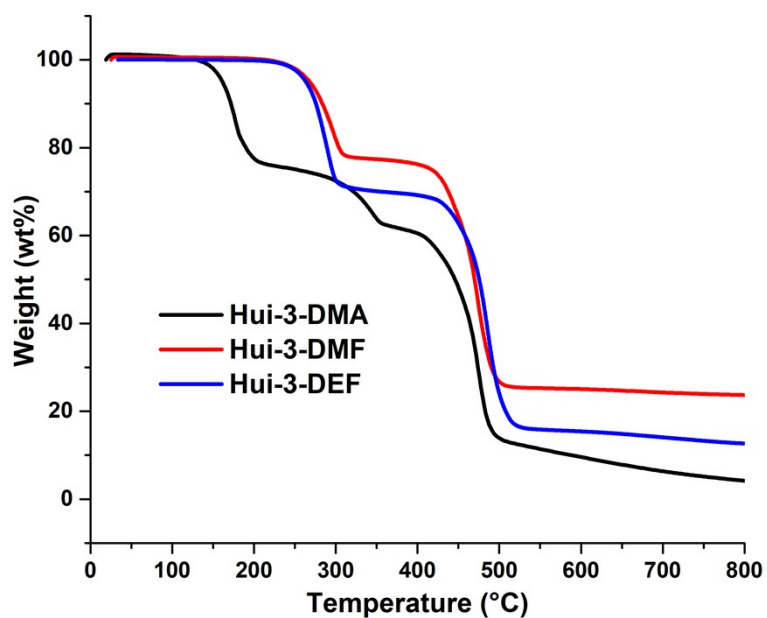

Fig. S3. TGA curves of the compounds.

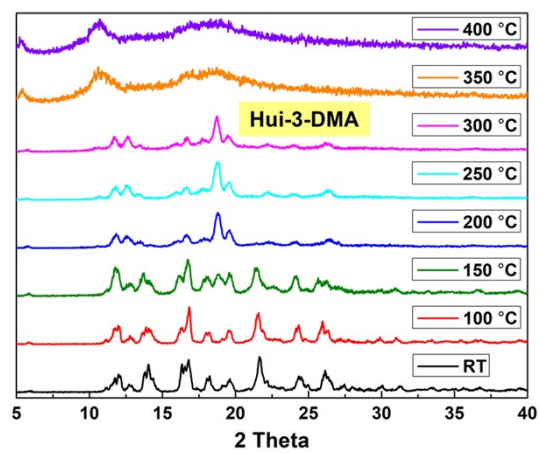

(a)

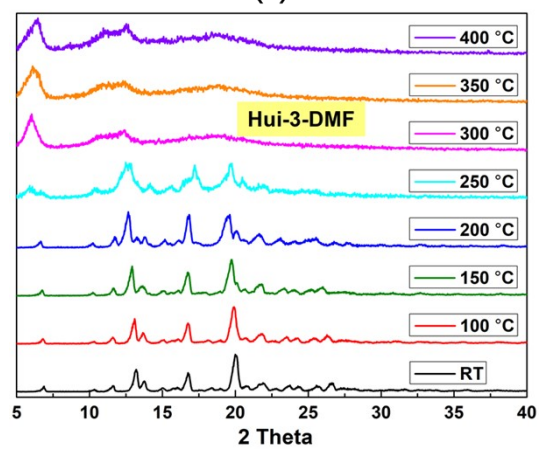

(b)

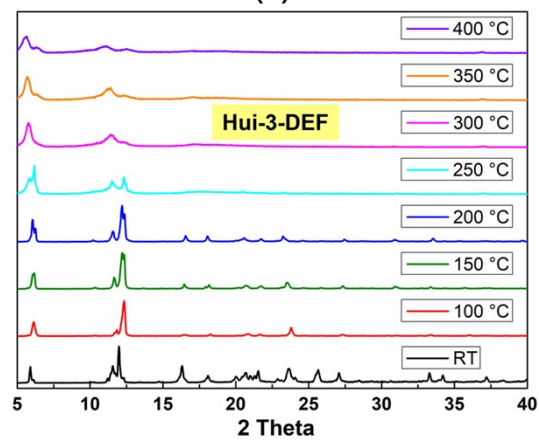

(c)

Fig. S4. Various temperature PXRD patterns for the as-synthesized samples of the compounds.

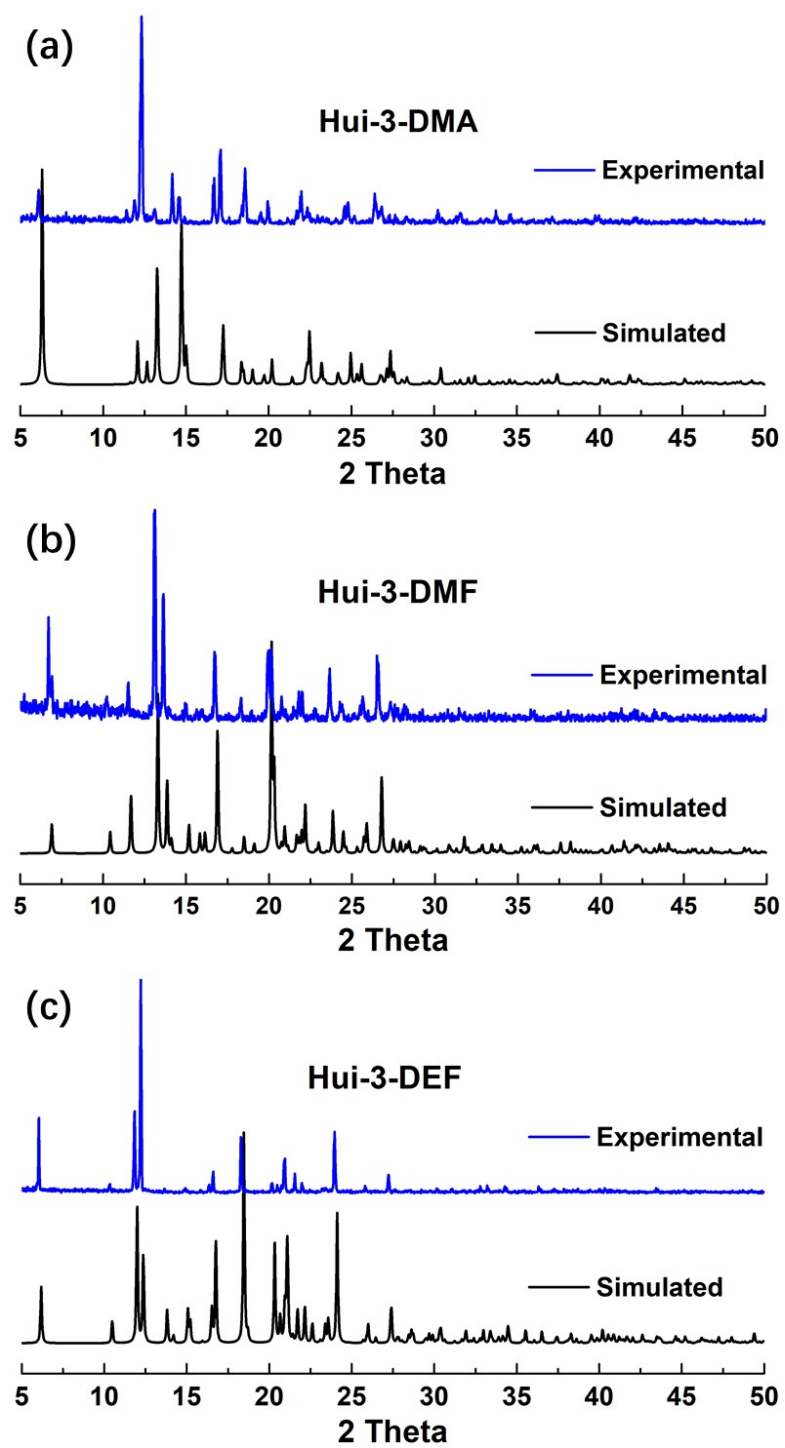

Fig. S5. PXR D patterns of the as-synthesized samples of the compounds.

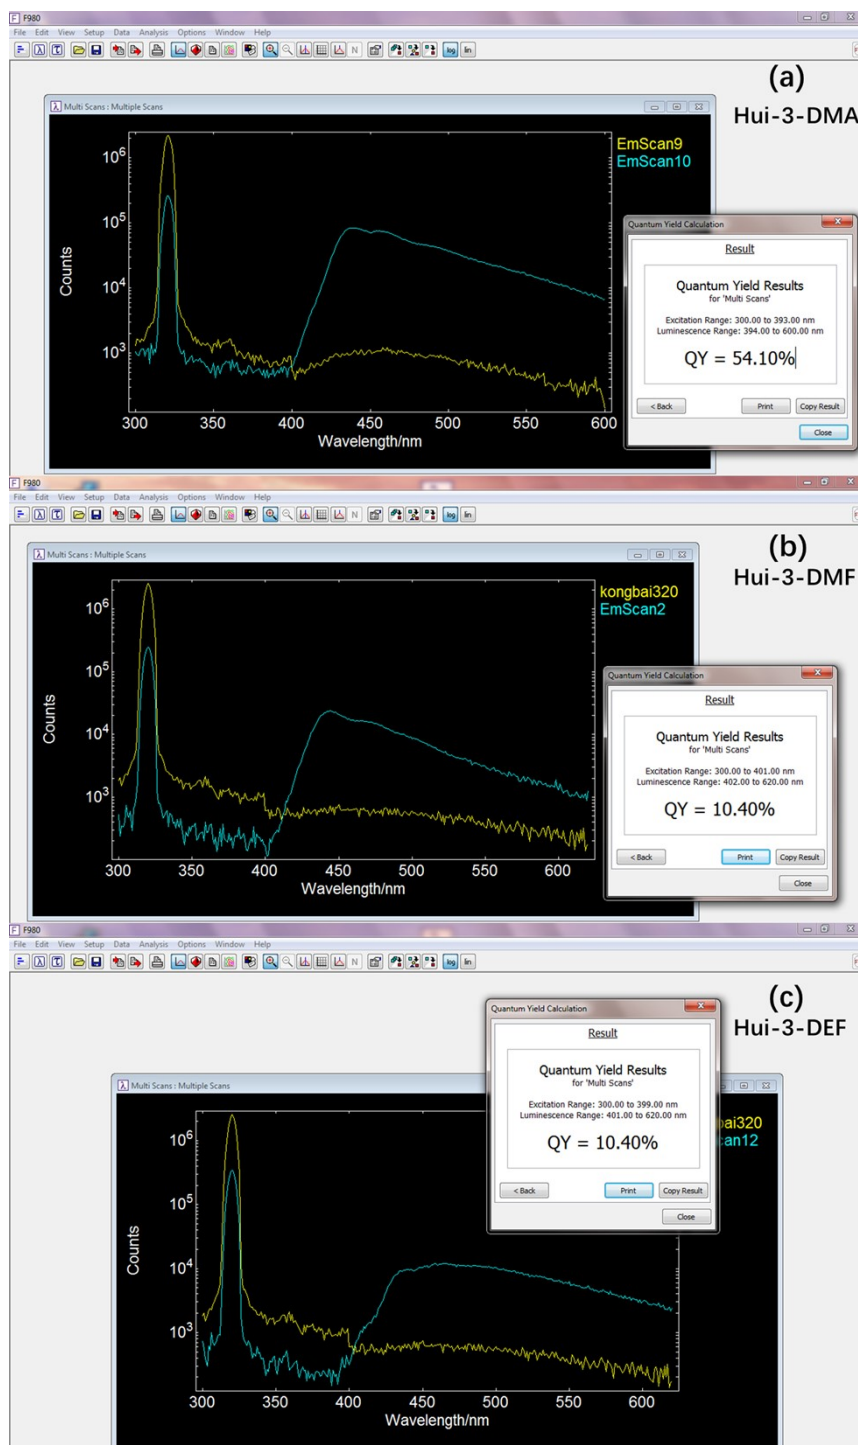

Fig. S6. Various temperature PXRD patterns for the as-synthesized samples of the compounds.



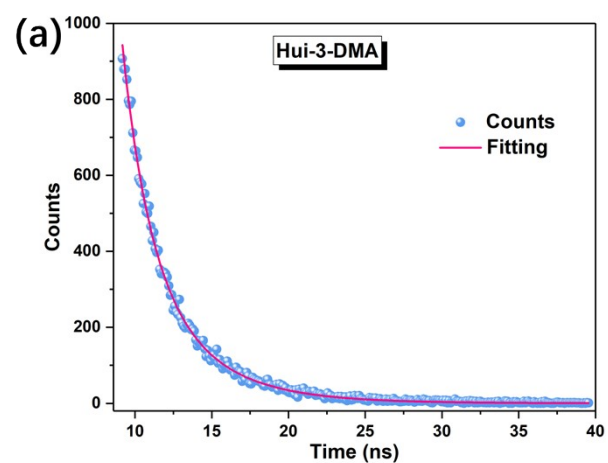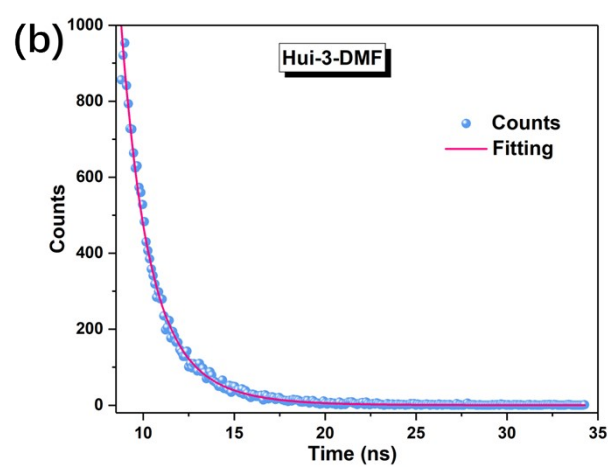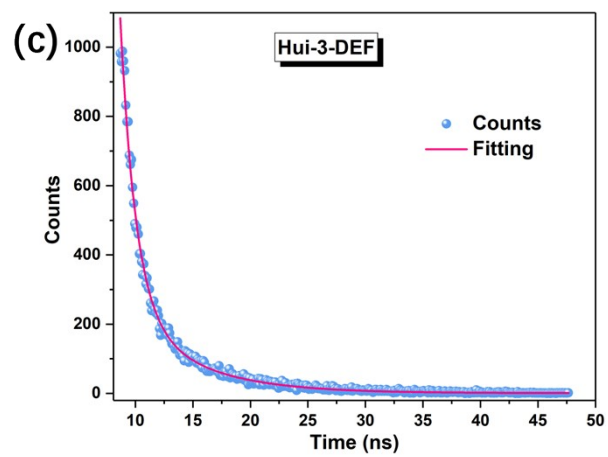

**Fig. S7.** Fitting curves for fluorescence lifetimes of the three complexes.

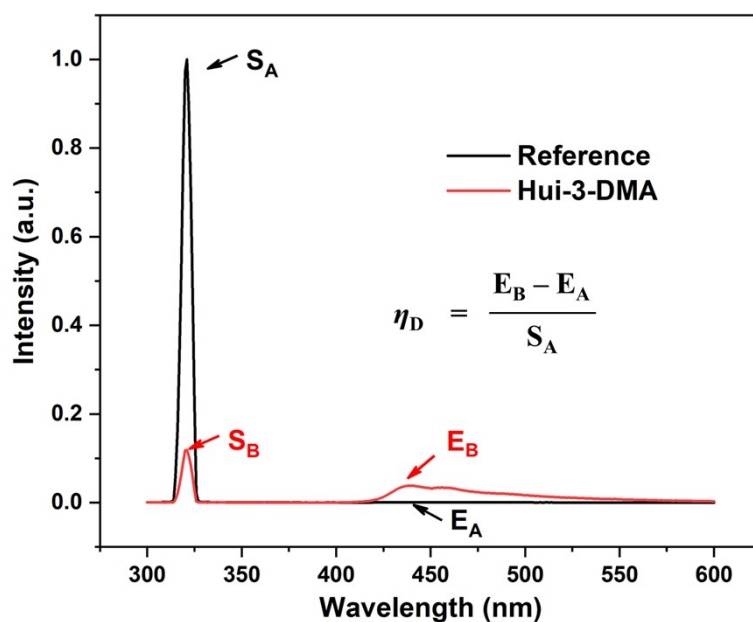

**Fig. S8.** Calculation of the external quantum yield ( $\eta_D$ ) for **Hui-3-DMA**.  $S_A$  and  $S_B$  are the intensity of the scattering peaks for the reference and **Hui-3-DMA**;  $E_A$  and  $E_B$  are the intensity of the emission peaks for the reference and **Hui-3-DMA**.

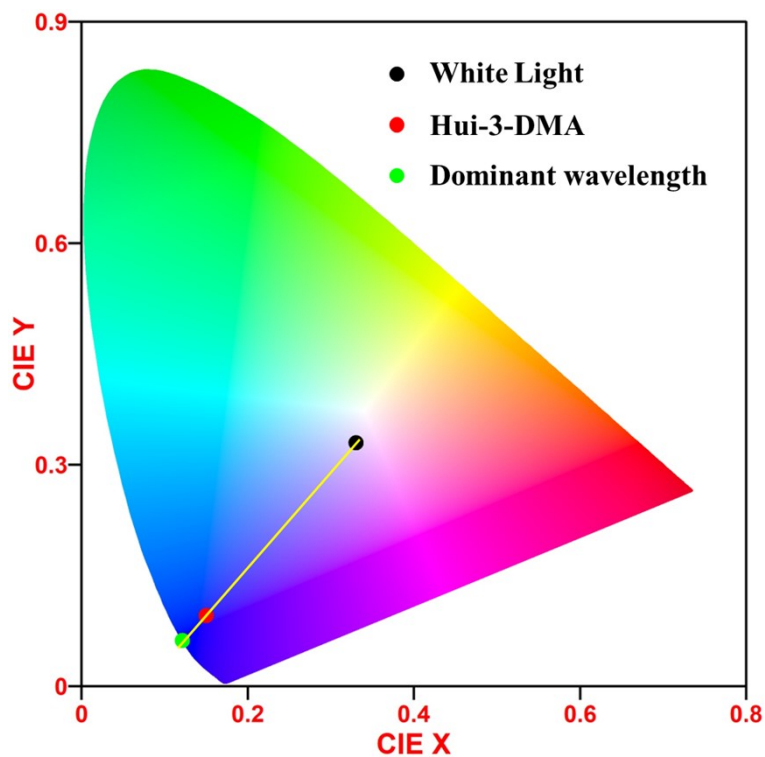

**Fig. S9.** Calculation of the color purity for **Hui-3-DMA**. Black point is the CIE of white light (0.33, 0.33); red point is the CIE of **Hui-3-DMA** (0.1492, 0.0962); green point is the CIE of the dominant wavelength.

### Variable-temperature photoluminescence test:

First, the 1 cm<sup>2</sup> tablet samples were fixed on the copper plate of the liquid nitrogen thermostat, and then the liquid nitrogen thermostat was placed in the space of the spectrophotometer with the sample on the light path. To better control the temperature, the liquid nitrogen thermostat was evacuated during the test. The temperature of the sample in the liquid nitrogen thermostat was controlled by using an East changing TC280 temperature controller with an uncertainty of <0.1 K. The samples were kept at each test temperature for 5 min before being tested. The measurements can be performed from 80 to 420 K.

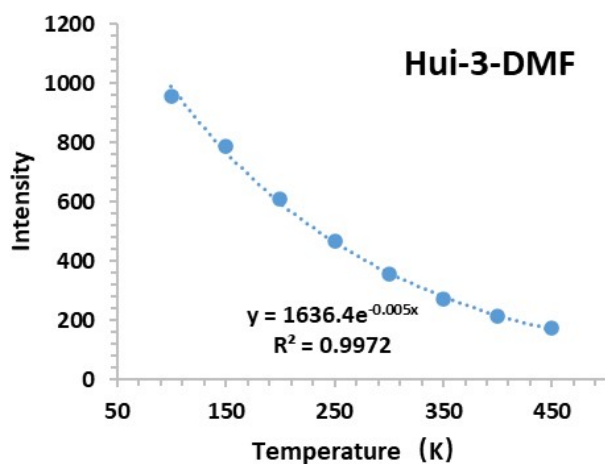

**Fig. S10.** Nonlinear fitting plots of the relative fluorescence quenching of three complexes in different temperature ranges of the three complexes.

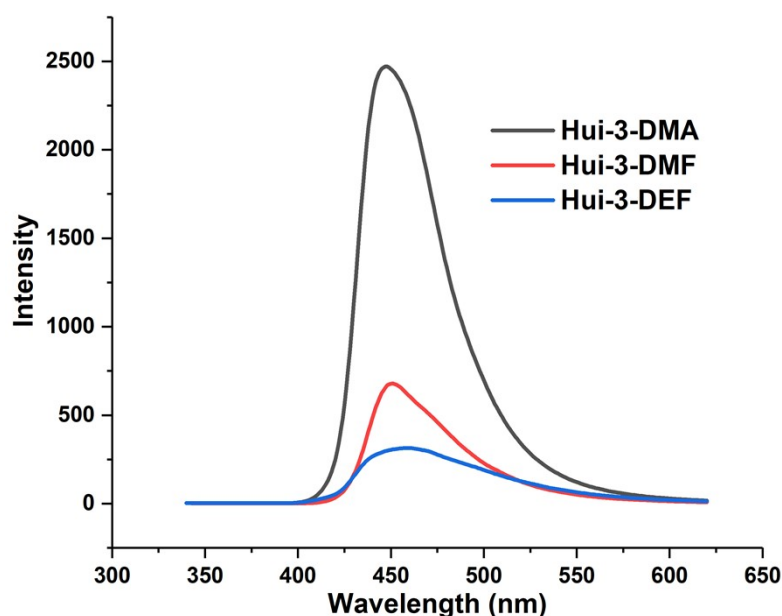

**Fig. S11.** Emission spectra of the Hui-3 complexes excited at 320 nm with the same Ex (2.5 nm) and Em slit (1.0 nm).

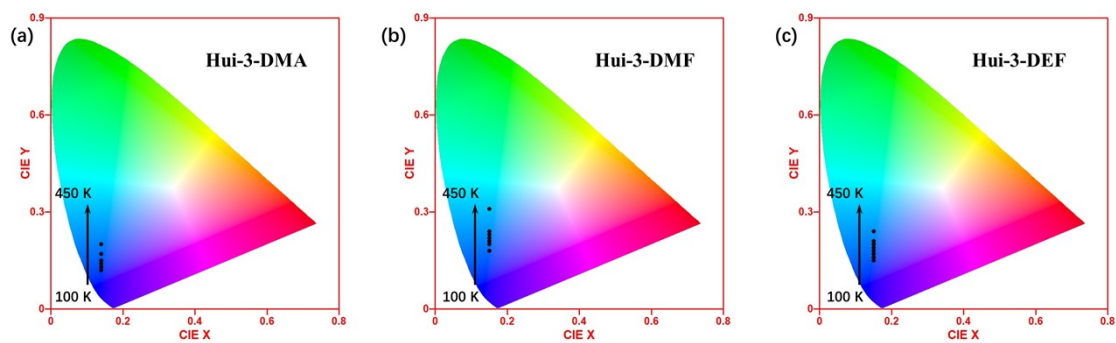

**Fig. S12.** The CIE color coordinates of the Hui-3 complexes.

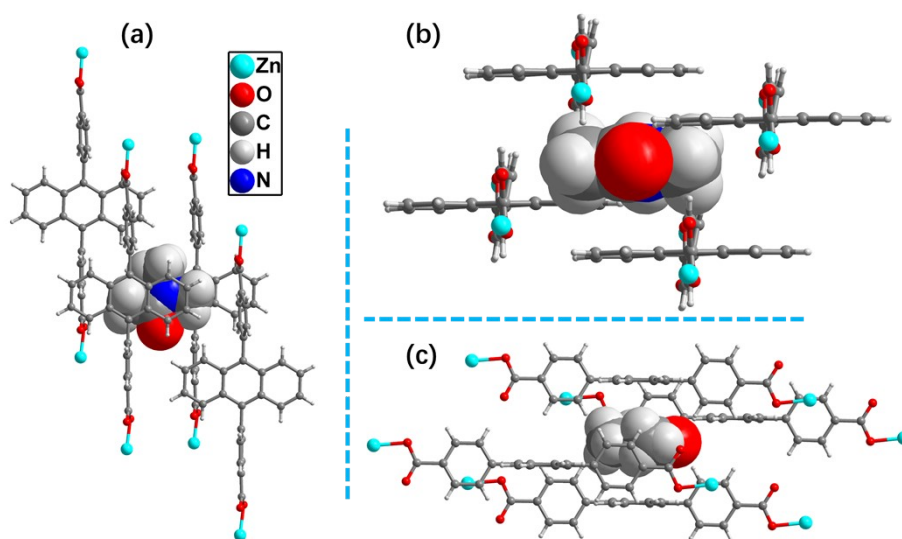

**Fig. S13.** Structures of **Hui-3-DMA** along different perspectives showing the encapsulation of one free DMA molecule in each void formed by adjacent four ligands.

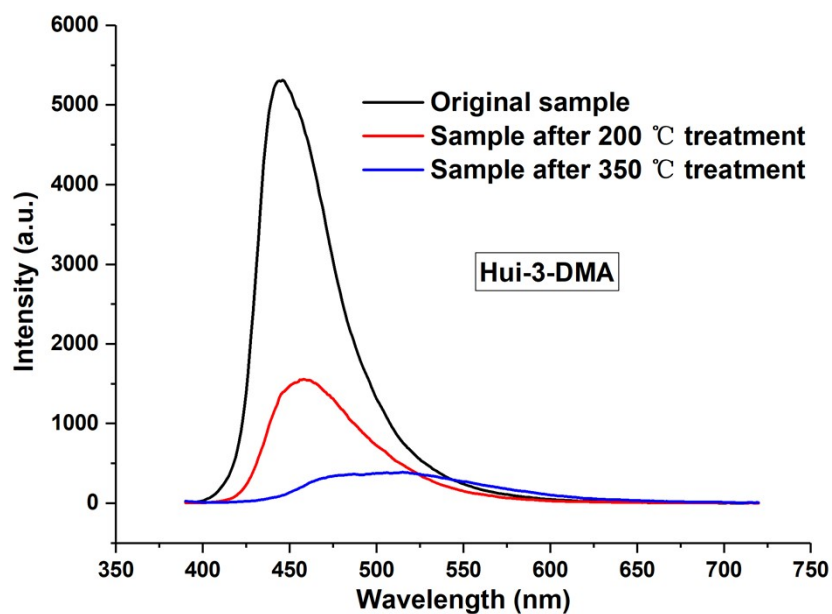

**Fig. S14.** Emission spectra of the **Hui-3-DMA** samples after different temperature treatment.

**Table S3.** The quantum yields of the CPs in this work and other reported references.

| Samples                                                                                                                            | $\Phi_f$ (%)  | Temp.      | Pressure          | Ligand                                                                                                                                                                       | Ref. DOI                      |
|------------------------------------------------------------------------------------------------------------------------------------|---------------|------------|-------------------|------------------------------------------------------------------------------------------------------------------------------------------------------------------------------|-------------------------------|
| Hui-3-DMA                                                                                                                          | 54.1          | RT         |                   | 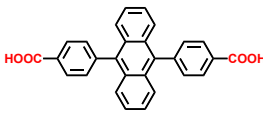                                                                                           | This work                     |
| Hui-3-DMF                                                                                                                          | 10.4          | RT         | 1 atm             |                                                                                                                                                                              |                               |
| Hui-3-DEF                                                                                                                          | 10.4          | RT         |                   |                                                                                                                                                                              |                               |
| $[(\text{CH}_3)_2\text{NH}_2]_{15}[(\text{Cd}_2\text{Cl})_3(\text{TATP}\text{T})_4] \cdot 12\text{DMF} \cdot 18\text{H}_2\text{O}$ | 15.1%         | RT         | 1 atm             |                                                                                            | 10.1038/ncomms3717            |
| $[\text{Zn}(\mu\text{-L})(\mu\text{-1,3-dpp})]$                                                                                    | 2.5%<br>18.4% | RT<br>77 K | 1 atm             | <br>     | 10.1021/acs.inorgchem.7b00457 |
| $\text{Y}(\text{BTC})(\text{H}_2\text{O})_6$                                                                                       | 2.8%<br>75%   | RT         | 1 atm<br>10.0 GPa |                                                                                           | 10.1002/adfm.202300109        |
| NENU-524                                                                                                                           | 7.5%          | RT         | 1 atm             | <br> | 10.1039/c6qi00528d            |
| $[\text{Zn}_4\text{OL}_2 \cdot x\text{DMF}]_n$<br>$[\text{Zn}_4\text{OL}_2]_n$                                                     | 35.5%<br>29.1 | RT         | 1 atm             |                                                                                          | 10.1039/C8QI00747K            |
